# Supplementary material
Source: PubMed Central journal article supplement (PMC6200520)
Supplement: medi-97-e12734-s001.pdf [file medi-97-e12734-s001.pdf]

**Appendix**  
**Data collection form**

**Vitamin D Supplementation to Prevent Vitamin D Deficiency for Children with  
Epilepsy: Randomized Pragmatic Trial Protocol**

**Authors:**

Reem Al Khalifah, MBBS, Msc, Abrar Hudairi, MBBS, Doua Al Homyani, MBBS,  
Muddathir H Hamad, MBBS, Fahad A. Bashiri, MD

**Baseline data form visit 1**

Sex: Male Female

Age-----

Date of Birth:

City: .....

Educational level: Father: ----- Mother: -----

Pregnancy: Full Term Preterm

DEVELOPMENTAL HISTORY: Normal Delayed

Seizure Type:

Idiopathic Cryptogenic (cause unknown) Symptomatic  
(lesion)

Treatment failure:

1-SEIZURE Control Over last 6 months :

Seizure Free: yes NO

if not seizure free over last 6 months, what is the most applicable seizure frequency:

per day .....per week ..... per month.....

2-New AED added: yes NO

3-Current AED dose increased: yes NO

Other medical diagnosis:

|  |  |
|--|--|
|  |  |
|  |  |

Medications:

CURRENT AEDs

| Type | AED Name      | Total Dose/day | Type | AED Name       | Total Dose/day |
|------|---------------|----------------|------|----------------|----------------|
|      | Carbamazepine |                |      | phenobarbitone |                |
|      | Valproic Acid |                |      | Topiramate     |                |
|      | Lamotrigine   |                |      | Ethosuximide   |                |
|      | Levetiracetam |                |      | Clonazepam     |                |

|  |           |  |  |            |  |
|--|-----------|--|--|------------|--|
|  | Phenytoin |  |  | Clobazam   |  |
|  |           |  |  | Vigabatrin |  |
|  |           |  |  |            |  |

**Other medications:**

|  | Start of therapy date | Dose | Indication |
|--|-----------------------|------|------------|
|  |                       |      |            |
|  |                       |      |            |

**OTHER TREATMENT:**

Ketogenic Diet: Yes No

Vagal Nerve Stimulation Yes No

Epilepsy surgery: Yes No

**Vitamin D deficiency risk factors:**

1. Family member with vitamin D deficiency Yes No

2. Previous treatment for vitamin D deficiency Yes No

3. Outdoor time (Hr/day).....

4. Screen time (Hr/day).....

5. Self-reported sun exposure time (Hr/day).....

6. Physical activity min/day (Hr/day).....

**7. Nutritional intake: food frequency questionnaire**

**CLINICAL EXAMINATION**

Weight: \_\_\_\_\_kg Height: \_\_\_\_\_cm

BMI=.....Kg/m<sup>2</sup> BMI z-score:.....

**Rickets signs:** Yes No

If yes specify which signs:

Bowing of long bones Yes No

Wide wrist jointYes No

Rackitic rosery Yes No

Harrison sulcus Yes No

Craniotabes Yes No

**INVESTIGATIONS:**

| <b>Test name</b>                   | <b>Level</b> | <b>N, L,<br/>H</b> | <b>Action<br/>required</b> | <b>Issue<br/>cleared</b> |
|------------------------------------|--------------|--------------------|----------------------------|--------------------------|
| <b>CBC: WBC</b>                    |              |                    |                            |                          |
| <b>HB</b>                          |              |                    |                            |                          |
| <b>PLT</b>                         |              |                    |                            |                          |
| <b>Total ca</b>                    |              |                    |                            |                          |
| <b>Albumin</b>                     |              |                    |                            |                          |
| <b>Corrected ca</b>                |              |                    |                            |                          |
| <b>AST</b>                         |              |                    |                            |                          |
| <b>ALT</b>                         |              |                    |                            |                          |
| <b>GGT</b>                         |              |                    |                            |                          |
| <b>ALP</b>                         |              |                    |                            |                          |
| <b>25 hydroxy Vitamin D level</b>  |              |                    |                            |                          |
| <b>PTH</b>                         |              |                    |                            |                          |
| <b>TSH</b>                         |              |                    |                            |                          |
| <b>FT4</b>                         |              |                    |                            |                          |
| <b>Urine Ca/creatinine ratio</b>   |              |                    |                            |                          |
| <b>PH</b>                          |              |                    |                            |                          |
| <b>Co2</b>                         |              |                    |                            |                          |
| <b>HCO3</b>                        |              |                    |                            |                          |
| <b>BUN</b>                         |              |                    |                            |                          |
| <b>Creatinin</b>                   |              |                    |                            |                          |
| <b>Celiac screening</b>            |              |                    |                            |                          |
| <b>Bone mineral density</b>        |              |                    |                            |                          |
| <b>Total body Z-score</b>          |              |                    |                            |                          |
| <b>Spine body Z-score</b>          |              |                    |                            |                          |
| <b>Femoral neck body Z-score</b>   |              |                    |                            |                          |
| <b>Fracture rate last 6 months</b> |              |                    |                            |                          |

**Vitamin D Supplementation to Prevent Vitamin D Deficiency for Children with  
Epilepsy: Randomized Pragmatic Trial Protocol**

**Post-treatment data form visit 2**

**Treatment course number** .....

**Treatment failure** Over the last **2 months** :

**SEIZURE Control**

Seizure Free:       yes                       NO

if not seizure free over last **2 months**, what is the most applicable seizure frequency:

per day .....  per week .....                       per month.....

**2-New AED added:**               yes                       NO

**3- Current ADE dose increased:**               yes                       NO

**CURRENT AEDs**

| Type | AED Name      | Total Dose/day | Type | AED Name       | Total Dose/day |
|------|---------------|----------------|------|----------------|----------------|
|      | Carbamazepine |                |      | phenobarbitone |                |
|      | Valproic Acid |                |      | Topiramate     |                |
|      | Lamotrigine   |                |      | Ethosuximide   |                |
|      | Levetiracetam |                |      | Clonazepam     |                |
|      | Phenytoin     |                |      | Clobazam       |                |
|      |               |                |      | Vigabatin      |                |
|      |               |                |      |                |                |

**Other medications:**

|  | Start of therapy<br>date | Dose | Indication |
|--|--------------------------|------|------------|
|  |                          |      |            |
|  |                          |      |            |

**OTHER TREATMENT:**

Ketogenic Diet: Yes No  
 Vagal Nerve Stimulation Yes No  
 Epilepsy surgery: Yes No

**Vitamin D deficiency risk factors:**

1. Family member with vitamin D deficiency Yes No
2. Previous treatment for vitamin D deficiency Yes No
3. Outdoor time (Hr/day).....
4. Screen time (Hr/day).....
5. Self-reported sun exposure time (Hr/day).....
6. Physical activity min/day (Hr/day).....

**CLINICAL EXAMINATION**

Weight: \_\_\_\_\_kg      Height: \_\_\_\_\_cm  
 BMI=.....Kg/m<sup>2</sup>      BMI z-score:.....

**Rickets signs:** Yes No

If yes specify which signs:

- Bowing of long bones Yes No  
 Wide wrist jointYes No  
 Rackitic rosery Yes No  
 Harrison sulcusYes No  
 Craniotabes Yes No

**INVESTIGATIONS:**

| Test name         | Level | N, L,<br>H | Action required | Issue cleared |
|-------------------|-------|------------|-----------------|---------------|
| Total Calcium     |       |            |                 |               |
| ALP               |       |            |                 |               |
| Corrected Calcium |       |            |                 |               |
| PTH               |       |            |                 |               |

|                                          |  |  |  |  |
|------------------------------------------|--|--|--|--|
| <b>Urine<br/>Ca/creatinine<br/>ratio</b> |  |  |  |  |
| <b>25 (OH) vitamin<br/>D Level</b>       |  |  |  |  |

**Vitamin D Supplementation to Prevent Vitamin D Deficiency for Children with  
Epilepsy: Randomized Pragmatic Trial Protocol  
Mid-study follow up data form visit 4**

**INVESTIGATIONS:**

| <b>Test name</b>                                                          | <b>Level</b> | <b>N, L,<br/>H</b> | <b>Action required</b> | <b>Issue cleared</b> |
|---------------------------------------------------------------------------|--------------|--------------------|------------------------|----------------------|
| <b>Total ca</b>                                                           |              |                    |                        |                      |
| <b>ALP</b>                                                                |              |                    |                        |                      |
| <b>Corrected Ca</b>                                                       |              |                    |                        |                      |
| <b>PTH</b>                                                                |              |                    |                        |                      |
| <b>Urine<br/>Ca/creatinine<br/>ratio</b>                                  |              |                    |                        |                      |
| <b>25 (OH)<br/>vitamin D<br/>Level 3<br/>months after<br/>prophylaxis</b> |              |                    |                        |                      |

**Vitamin D Supplementation to Prevent Vitamin D Deficiency for Children with  
Epilepsy: Randomized Pragmatic Trial Protocol**

**End of study data form visit 5**

**Treatment failure** Over the last **6 months** :

**SEIZURE Control**

Seizure Free:       yes                       NO

if not seizure free over last **6 months**, what is the most applicable seizure frequency:

per day .....  per week .....                       per month.....

**2-New AED added:**               yes                       NO

**3-Current ADE dose increased:**               yes                       NO

**CURRENT AEDs**

| Type | AED Name      | Total Dose/day | Type | AED Name       | Total Dose/day |
|------|---------------|----------------|------|----------------|----------------|
|      | Carbamazepine |                |      | phenobarbitone |                |
|      | Valproic Acid |                |      | Topiramate     |                |
|      | Lamotrigine   |                |      | Ethosuximide   |                |
|      | Levetiracetam |                |      | Clonazepam     |                |
|      | Phenytoin     |                |      | Clobazam       |                |
|      |               |                |      | Vigabatrin     |                |
|      |               |                |      |                |                |

**Other medications:**

|  | Start of therapy<br>date | Dose | Indication |
|--|--------------------------|------|------------|
|  |                          |      |            |



|  |  |  |  |
|--|--|--|--|
|  |  |  |  |
|--|--|--|--|

**OTHER TREATMENT:**

- Ketogenic Diet: Yes No
- Vagal Nerve Stimulation Yes No
- Epilepsy surgery: Yes No

**Vitamin D deficiency risk factors:**

1. Family member with vitamin D deficiency Yes No
2. Previous treatment for vitamin D deficiency Yes No
3. Outdoor time (Hr/day).....
4. Screen time (Hr/day).....
5. Self-reported sun exposure time (Hr/day).....
6. Physical activity min/day (Hr/day).....

**CLINICAL EXAMINATION**

Weight: \_\_\_\_\_kg      Height: \_\_\_\_\_cm

BMI=.....Kg/m<sup>2</sup>      BMI z-score:.....

**Rickets signs:** Yes No

If yes specify which signs:

- Bowing of long bones Yes No
- Wide wrist jointYes No
- Rackitic rosery Yes No
- Harrison sulcusYes No
- Craniotabes Yes No

**INVESTIGATIONS:**

| Test name                        | Level | N, L,<br>H | Action<br>required | Issue cleared |
|----------------------------------|-------|------------|--------------------|---------------|
| <b>Total ca</b>                  |       |            |                    |               |
| <b>ALP</b>                       |       |            |                    |               |
| <b>Corrected Ca</b>              |       |            |                    |               |
| <b>PTH</b>                       |       |            |                    |               |
| <b>Urine Ca/creatinine ratio</b> |       |            |                    |               |

|                                                                   |  |  |  |  |
|-------------------------------------------------------------------|--|--|--|--|
| <b>25 (OH) vitamin D Level<br/>6 months after<br/>prophylaxis</b> |  |  |  |  |
| <b>Bone mineral density</b>                                       |  |  |  |  |
| <b>Total body Z-score</b>                                         |  |  |  |  |
| <b>Spine body Z-score</b>                                         |  |  |  |  |
| <b>Femoral neck body Z-<br/>score</b>                             |  |  |  |  |
| <b>Fracture rate last 6<br/>months</b>                            |  |  |  |  |

Abbreviations:

N, L, H : Normal,Low,High

AED: Antiepileptic Drug

BMI: Body Mass Index

PTH: Parathyroid Hormone

BMD: Bone Mineral Density

25 OH Vitamin D: 25-Hydroxy Vitamin D

CBC: Complete Blood Count

WBC: White Blood Cell

HB: Hemoglobin

PLT: Platelet

Ca: Calcium

AST: Aspartate aminotransferase

ALT: Alanine transaminase

GGT: Gamma-glutamyl transferase

ALP: Alkaline Phosphatase

TSH: Thyroid Stimulating Hormone

FT4: Free thyroxine

Co2: Carbon dioxide

HCO3: Bicarbonate

BUN: Blood urea nitrogen
